# Supplementary material
Source: HighWire-hosted journal article supplement (https://drc.bmj.com/content/suppl/2020/10/18/8.1.e001707)
Supplement: bmjdrc-2020-001707supp001_data_supplement.pdf [file bmjdrc-2020-001707supp001_data_supplement.pdf]

## APPENDIX:

**Table 1A: Descriptive characteristics of study subjects aged 40-79 years -by glycaemic status. German Health Interview and Examination Survey for Adults 2008-2011 (DEGS1)**

|                                     | Diagnosed diabetes<br>(n=518) |         |      | Undiagnosed diabetes<br>(n=135) |         |      | Normoglycemia<br>(n=4451) |         |      |      |      |      |
|-------------------------------------|-------------------------------|---------|------|---------------------------------|---------|------|---------------------------|---------|------|------|------|------|
|                                     | %*                            | 95% CI* | n    | %*                              | 95% CI* | n    | %*                        | 95% CI* | n    |      |      |      |
| <b>Sex</b>                          |                               |         |      |                                 |         |      |                           |         |      |      |      |      |
| Men                                 | 53.6                          | 47.9    | 59.3 | 298                             | 70.6    | 61.6 | 78.2                      | 90      | 48.2 | 46.2 | 50.3 | 2053 |
| Women                               | 46.4                          | 40.7    | 52.1 | 220                             | 29.4    | 21.8 | 38.4                      | 45      | 51.8 | 49.7 | 53.8 | 2398 |
| <b>Age group, years</b>             |                               |         |      |                                 |         |      |                           |         |      |      |      |      |
| 40-49                               | 7.5                           | 4.8     | 11.6 | 29                              | 25.3    | 16.2 | 37.3                      | 21      | 35.1 | 33.6 | 36.6 | 1215 |
| 50-59                               | 16.0                          | 12.6    | 20.2 | 76                              | 20.1    | 14.2 | 27.5                      | 26      | 28.9 | 27.4 | 30.4 | 1273 |
| 60-69                               | 31.2                          | 26.2    | 36.7 | 183                             | 21.6    | 15.1 | 30.0                      | 42      | 20.1 | 18.8 | 21.3 | 1146 |
| 70-79                               | 45.2                          | 39.5    | 51.0 | 230                             | 33.0    | 23.7 | 43.8                      | 46      | 16.0 | 14.9 | 17.2 | 817  |
| Mean±SD                             | 65.8                          | 64.8    | 66.9 | 518                             | 60.9    | 58.2 | 63.5                      | 135     | 56.0 | 55.6 | 56.3 | 4451 |
| <b>Community</b>                    |                               |         |      |                                 |         |      |                           |         |      |      |      |      |
| Rural area/small city               | 44.6                          | 35.4    | 54.1 | 238                             | 51.7    | 35.4 | 67.6                      | 61      | 41.1 | 33.5 | 49.1 | 1879 |
| Middle /large city                  | 55.4                          | 45.9    | 64.6 | 280                             | 48.3    | 32.4 | 64.6                      | 74      | 58.9 | 50.9 | 66.5 | 2572 |
| <b>Region</b>                       |                               |         |      |                                 |         |      |                           |         |      |      |      |      |
| Western Germany                     | 74.3                          | 66.1    | 81.1 | 309                             | 88.0    | 75.0 | 94.7                      | 109     | 78.5 | 72.1 | 83.8 | 3016 |
| Eastern Germany                     | 25.7                          | 18.9    | 33.9 | 209                             | 12.0    | 5.3  | 25.0                      | 26      | 21.5 | 16.2 | 27.9 | 1435 |
| <b>Education</b>                    |                               |         |      |                                 |         |      |                           |         |      |      |      |      |
| Low                                 | 62.6                          | 56.6    | 68.3 | 277                             | 61.0    | 50.0 | 70.9                      | 70      | 43.2 | 40.5 | 46.0 | 1606 |
| Middle /High                        | 37.4                          | 31.7    | 43.4 | 237                             | 39.0    | 29.1 | 50.0                      | 63      | 56.8 | 54.0 | 59.5 | 2818 |
| Missing                             |                               |         |      | 4                               |         |      |                           | 2       |      |      |      | 27   |
| <b>Living alone</b>                 |                               |         |      |                                 |         |      |                           |         |      |      |      |      |
| Yes                                 | 22.0                          | 17.4    | 27.5 | 100                             | 24.5    | 17.3 | 33.6                      | 28      | 15.5 | 14.0 | 17.0 | 670  |
| No                                  | 78.0                          | 72.5    | 82.6 | 407                             | 75.5    | 66.4 | 82.7                      | 103     | 84.5 | 83.0 | 86.0 | 3710 |
| Missing                             |                               |         |      | 11                              |         |      |                           | 4       |      |      |      | 71   |
| <b>Obesity</b>                      |                               |         |      |                                 |         |      |                           |         |      |      |      |      |
| Yes (BMI>=30 kg/m <sup>2</sup> )    | 54.9                          | 49.1    | 60.6 | 283                             | 58.0    | 47.6 | 67.7                      | 69      | 24.5 | 22.7 | 26.4 | 1060 |
| No (BMI<30 kg/m <sup>2</sup> )      | 45.1                          | 39.4    | 50.9 | 232                             | 42.0    | 32.3 | 52.4                      | 65      | 75.5 | 73.6 | 77.3 | 3359 |
| Missing                             |                               |         |      | 3                               |         |      |                           | 1       |      |      |      | 32   |
| <b>Currently smoking</b>            |                               |         |      |                                 |         |      |                           |         |      |      |      |      |
| Yes                                 | 18.6                          | 14.6    | 23.3 | 86                              | 24.6    | 15.3 | 37.0                      | 29      | 24.5 | 22.6 | 26.6 | 970  |
| No                                  | 81.4                          | 76.7    | 85.4 | 427                             | 75.4    | 63.0 | 84.7                      | 105     | 75.5 | 73.4 | 77.4 | 3457 |
| Missing                             |                               |         |      | 5                               |         |      |                           | 1       |      |      |      | 24   |
| <b>Sports activity</b>              |                               |         |      |                                 |         |      |                           |         |      |      |      |      |
| No sports                           | 48.3                          | 42.5    | 54.1 | 231                             | 44.8    | 34.7 | 55.4                      | 53      | 34.8 | 32.8 | 36.8 | 1399 |
| Any sports                          | 51.7                          | 45.9    | 57.5 | 255                             | 55.2    | 44.6 | 65.3                      | 75      | 65.2 | 63.2 | 67.2 | 2930 |
| Missing                             |                               |         |      | 32                              |         |      |                           | 7       |      |      |      | 122  |
| <b>Alcohol use</b>                  |                               |         |      |                                 |         |      |                           |         |      |      |      |      |
| No alcohol use                      | 19.7                          | 14.6    | 26.2 | 87                              | 11.3    | 6.2  | 19.6                      | 13      | 13.4 | 11.9 | 14.9 | 518  |
| Moderate drinking                   | 67.8                          | 61.1    | 73.7 | 355                             | 78.2    | 68.8 | 85.4                      | 94      | 68.5 | 66.7 | 70.3 | 3025 |
| Risky drinking                      | 12.5                          | 9.2     | 16.9 | 65                              | 10.4    | 6.5  | 16.4                      | 25      | 18.1 | 16.7 | 19.5 | 847  |
| Missing                             |                               |         |      | 11                              |         |      |                           | 3       |      |      |      | 61   |
| <b>Parental history of diabetes</b> |                               |         |      |                                 |         |      |                           |         |      |      |      |      |
| Yes                                 | 53.8                          | 47.3    | 60.2 | 244                             | 44.2    | 32.3 | 56.7                      | 47      | 30.7 | 28.8 | 32.6 | 1276 |
| No                                  | 46.2                          | 39.8    | 52.7 | 188                             | 55.8    | 43.3 | 67.7                      | 72      | 69.3 | 67.4 | 71.2 | 2872 |
| Missing                             |                               |         |      | 86                              |         |      |                           | 16      |      |      |      | 303  |
| <b>Depressive symptoms (PHQ-9)</b>  |                               |         |      |                                 |         |      |                           |         |      |      |      |      |
| Yes (PHQ-9≥10)                      | 11.0                          | 7.6     | 15.6 | 47                              | 7.1     | 3.1  | 15.3                      | 8       | 6.6  | 5.7  | 7.8  | 258  |
| No (PHQ-9 <10)                      | 89.0                          | 84.4    | 92.4 | 420                             | 92.9    | 84.7 | 96.9                      | 117     | 93.4 | 92.2 | 94.3 | 3945 |
| Missing                             |                               |         |      | 51                              |         |      |                           | 10      |      |      |      | 248  |
| <b>Hyperlipidemia</b>               |                               |         |      |                                 |         |      |                           |         |      |      |      |      |

|                                               |         |      |      |      |     |      |      |      |     |      |      |      |      |
|-----------------------------------------------|---------|------|------|------|-----|------|------|------|-----|------|------|------|------|
|                                               | Yes     | 46.5 | 40.6 | 52.6 | 250 | 41.8 | 32.1 | 52.2 | 61  | 34.4 | 32.4 | 36.6 | 1612 |
|                                               | No      | 53.5 | 47.4 | 59.4 | 265 | 58.2 | 47.8 | 67.9 | 74  | 65.6 | 63.4 | 67.6 | 2813 |
|                                               | Missing |      |      |      | 3   |      |      |      | 0   |      |      |      | 26   |
| <b>Hypertension</b>                           | Yes     | 77.1 | 71.2 | 82.1 | 405 | 64.7 | 55.1 | 73.3 | 94  | 40.7 | 38.8 | 42.7 | 1982 |
|                                               | No      | 22.9 | 17.9 | 28.8 | 112 | 35.3 | 26.7 | 44.9 | 41  | 59.3 | 57.3 | 61.2 | 2461 |
|                                               | missing |      |      |      | 1   |      |      |      | 0   |      |      |      | 8    |
| <b>Visiting a doctor within the past year</b> | Yes     | 96.2 | 92.1 | 98.2 | 501 | 81.9 | 71.6 | 89.0 | 112 | 90.4 | 89.2 | 91.5 | 4021 |
|                                               | No      | 3.8  | 1.8  | 7.9  | 14  | 18.1 | 11.0 | 28.4 | 21  | 9.6  | 8.5  | 10.8 | 380  |
|                                               | Missing |      |      |      | 3   |      |      |      | 2   |      |      |      | 50   |

\* Weighted to the population of 31.12.2010.

Hyperlipidemia: defined as total cholesterol  $\geq 6.2$  mmol/l or currently using lipids-lowering drugs for the treatment of physician-diagnosed hyperlipidemia

Hypertension: defined as systolic blood pressure  $\geq 140$  mmHg (18.7 kPa) or diastolic blood pressure  $\geq 90$  mmHg (12.0 kPa) or currently using anti-hypertensive drugs for the treatment of physician-diagnosed hypertension

BMI: body mass index

PHQ-9: 9-item depression module of the Patient Health Questionnaire

**Table 2A: Multinomial logistic regression of factors associated with undiagnosed and diagnosed type 2 diabetes (T2D) – by complete case method. German Health Interview and Examination Survey for Adults 2008-2011 (DEGS1)**

|                                               |                                                   | Undiagnosed T2D vs. Normoglycemia |             |             | Diagnosed T2D vs. Normoglycemia |             |             |             |              |
|-----------------------------------------------|---------------------------------------------------|-----------------------------------|-------------|-------------|---------------------------------|-------------|-------------|-------------|--------------|
|                                               |                                                   | RRR                               | 95% CI      | p           | RRR                             | 95% CI      | p           |             |              |
| <b>Sex</b>                                    |                                                   |                                   |             |             |                                 |             |             |             |              |
|                                               | <i>Men vs. women</i>                              | <b>3.21</b>                       | <b>2.00</b> | <b>5.13</b> | <b>0.000</b>                    | <b>1.76</b> | <b>1.27</b> | <b>2.43</b> | <b>0.001</b> |
| <b>Age, per year</b>                          |                                                   | <b>1.03</b>                       | <b>1.00</b> | <b>1.06</b> | <b>0.032</b>                    | <b>1.07</b> | <b>1.06</b> | <b>1.09</b> | <b>0.000</b> |
| <b>Education</b>                              |                                                   |                                   |             |             |                                 |             |             |             |              |
|                                               | <i>Low vs. middle/high</i>                        | 1.34                              | 0.83        | 2.17        | 0.229                           | 1.15        | 0.83        | 1.59        | 0.401        |
| <b>Community size</b>                         |                                                   |                                   |             |             |                                 |             |             |             |              |
|                                               | <i>Rural/small cities vs. middle/large cities</i> | 1.71                              | 0.91        | 3.22        | 0.098                           | 0.96        | 0.71        | 1.30        | 0.805        |
| <b>Region</b>                                 |                                                   |                                   |             |             |                                 |             |             |             |              |
|                                               | <i>Western vs. Eastern Germany</i>                | <b>2.93</b>                       | <b>1.31</b> | <b>6.59</b> | <b>0.009</b>                    | 1.00        | 0.73        | 1.36        | 0.987        |
| <b>Living alone</b>                           |                                                   |                                   |             |             |                                 |             |             |             |              |
|                                               | <i>Yes vs. No</i>                                 | <b>2.21</b>                       | <b>1.29</b> | <b>3.80</b> | <b>0.004</b>                    | 1.13        | 0.77        | 1.66        | 0.531        |
| Currently smoking                             |                                                   |                                   |             |             |                                 |             |             |             |              |
|                                               | <i>Yes vs. No</i>                                 | 1.34                              | 0.70        | 2.54        | 0.374                           | <b>1.49</b> | <b>1.00</b> | <b>2.20</b> | <b>0.049</b> |
| <b>Obesity (BMI&gt;=30 kg/m<sup>2</sup>)</b>  |                                                   |                                   |             |             |                                 |             |             |             |              |
|                                               | <i>Yes vs. No</i>                                 | <b>4.65</b>                       | <b>2.60</b> | <b>8.34</b> | <b>0.000</b>                    | <b>2.65</b> | <b>1.95</b> | <b>3.60</b> | <b>0.000</b> |
| <b>Alcohol use</b>                            |                                                   |                                   |             |             |                                 |             |             |             |              |
|                                               | <i>Moderate drinking vs. no use</i>               | 1.45                              | 0.58        | 3.60        | 0.425                           | 0.76        | 0.47        | 1.21        | 0.241        |
|                                               | <i>Risky drinking vs. no use</i>                  | 0.59                              | 0.22        | 1.59        | 0.297                           | <b>0.53</b> | <b>0.30</b> | <b>0.94</b> | <b>0.031</b> |
| <b>Sports activity</b>                        |                                                   |                                   |             |             |                                 |             |             |             |              |
|                                               | <i>no sports vs. any sports</i>                   | 1.30                              | 0.78        | 2.17        | 0.309                           | 1.25        | 0.92        | 1.71        | 0.151        |
| <b>Parental history of diabetes</b>           |                                                   |                                   |             |             |                                 |             |             |             |              |
|                                               | <i>Yes vs. No</i>                                 | <b>1.93</b>                       | <b>1.12</b> | <b>3.35</b> | <b>0.019</b>                    | <b>3.03</b> | <b>2.17</b> | <b>4.22</b> | <b>0.000</b> |
| <b>Hyperlipidemia</b>                         |                                                   |                                   |             |             |                                 |             |             |             |              |
|                                               | <i>Yes vs. No</i>                                 | 1.19                              | 0.69        | 2.05        | 0.533                           | 1.10        | 0.79        | 1.52        | 0.568        |
| <b>Hypertension</b>                           |                                                   |                                   |             |             |                                 |             |             |             |              |
|                                               | <i>Yes vs. No</i>                                 | <b>1.80</b>                       | <b>1.12</b> | <b>2.87</b> | <b>0.014</b>                    | <b>2.20</b> | <b>1.45</b> | <b>3.33</b> | <b>0.000</b> |
| <b>PHQ-9 (depressive symptoms)</b>            |                                                   |                                   |             |             |                                 |             |             |             |              |
|                                               | <i>Yes vs. No</i>                                 | 1.15                              | 0.44        | 3.00        | 0.781                           | 1.47        | 0.90        | 2.39        | 0.120        |
| <b>Visiting a doctor within the past year</b> |                                                   |                                   |             |             |                                 |             |             |             |              |
|                                               | <i>No vs. Yes</i>                                 | <b>2.25</b>                       | <b>1.05</b> | <b>4.84</b> | <b>0.038</b>                    | <b>0.27</b> | <b>0.08</b> | <b>0.95</b> | <b>0.041</b> |

Relative risk ratio (RRR) and 95 confidence intervals (95% CI) were derived from multinomial logistic regression models with diabetes status (diagnosed T2D, undiagnosed T2D and normoglycemia) as dependent variables. Bold values denote statistical significance at the  $p < 0.05$  level. Results were weighted to population of 31.12.2010.

Hyperlipidemia: defined as total cholesterol  $\geq 6.2$  mmol/l or currently using lipids-lowering drugs for the treatment of physician-diagnosed hyperlipidemia

Hypertension: defined as systolic blood pressure  $\geq 140$  mmHg (18.7 kPa) or diastolic blood pressure  $\geq 90$  mmHg (12.0 kPa) or currently using anti-hypertensive drugs for the treatment of physician-diagnosed hypertension

BMI: body mass index

PHQ-9: 9-item depression module of the Patient Health Questionnaire
